# Supplementary material
Source: Elsevier journal article supplement (https://comptes-rendus.academie-sciences.fr/biologies/article/10.1016/j.crvi.2009.05.001/file/attach/mmc2.pdf)
Supplement: mmc2 [file mmc2.pdf]

**Appendix 2. Weighting of the character-state transformations using the product CIex\*S  
(CIex, consistency index excluding uninformative characters; S, slope of saturation)**

|               | (A<->C)<br>CIex*S | (A<->G)<br>CIex*S | (A<->T)<br>CIex*S | (C<->G)<br>CIex*S | (G<->T)<br>CIex*S | (C<->T)<br>CIex*S |
|---------------|-------------------|-------------------|-------------------|-------------------|-------------------|-------------------|
| <i>I2S</i>    | 0.57*0.95         | 0.23*0.48         | 0.53*0.68         | 0.75*0.84         | 0.68*0.93         | 0.10*0.45         |
| <i>CO2</i>    | 0.43*0.70         | 0.18*0.47         | 0.40*0.50         | 0.71*0.86         | 0.65*0.67         | 0.10*0.17         |
| <i>Cyb</i>    | 0.34*0.70         | 0.21*0.51         | 0.37*0.65         | 0.62*0.89         | 0.64*0.82         | 0.10*0.26         |
| <i>κ-Cas</i>  | 0.78*0.97         | 0.51*0.93         | 0.79*0.98         | 0.96*1            | 0.83*0.79         | 0.53*0.82         |
| <i>PRKCi</i>  | 0.71*1            | 0.53*0.77         | 0.90*1            | 0.78*0.99         | 1*1               | 0.63*0.94         |
| <i>SPTBNI</i> | 0.94*1            | 0.44*0.90         | 0.85*1            | 0.88*1            | 0.83*1            | 0.57*0.98         |
| <i>TG</i>     | 0.81*0.99         | 0.41*0.86         | 0.93*1            | 0.92*1            | 0.70*0.99         | 0.39*0.77         |
